RESEARCH ARTICLE

# Identification of MicroRNAs and their Targets Associated with Embryo Abortion during Chrysanthemum Cross Breeding via High-Throughput Sequencing

Fengjiao Zhang<sup>1,2</sup>, Wen Dong<sup>3</sup>, Lulu Huang<sup>1</sup>, Aiping Song<sup>1</sup>, Haibin Wang<sup>1</sup>, Weimin Fang<sup>1</sup>, Fadi Chen<sup>1</sup>, Nianjun Teng<sup>1,2\*</sup>

**1** College of Horticulture, Nanjing Agricultural University, Nanjing, China, **2** Jiangsu Province Engineering Lab for Modern Facility Agriculture Technology & Equipment, Nanjing, China, **3** China Rural Technology Development Center, Beijing, China

\* [nianjunteng@163.com](mailto:nianjunteng@163.com)

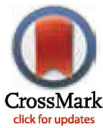

OPEN ACCESS

**Citation:** Zhang F, Dong W, Huang L, Song A, Wang H, Fang W, et al. (2015) Identification of MicroRNAs and their Targets Associated with Embryo Abortion during Chrysanthemum Cross Breeding via High-Throughput Sequencing. PLoS ONE 10(4): e0124371. doi:10.1371/journal.pone.0124371

**Academic Editor:** Jinxing Lin, Beijing Forestry University, CHINA

**Received:** October 15, 2014

**Accepted:** February 27, 2015

**Published:** April 24, 2015

**Copyright:** © 2015 Zhang et al. This is an open access article distributed under the terms of the [Creative Commons Attribution License](https://creativecommons.org/licenses/by/4.0/), which permits unrestricted use, distribution, and reproduction in any medium, provided the original author and source are credited.

**Data Availability Statement:** All relevant data are within the paper and its Supporting Information files.

**Funding:** This study was supported by the National Natural Science Foundation of China (31171983, 31471901), the Programs for New Century Excellent Talents in Universities, Ministry of Education of China (NCET-11-0669), the Fundamental Research Funds for the Central Universities (KYZ201308), and the fourth phase of Jiangsu "333" project to NJT. The funders had no role in study design, data collection and analysis, decision to publish, or preparation of the manuscript.

## Abstract

### Background

MicroRNAs (miRNAs) are important regulators in plant development. They post-transcriptionally regulate gene expression during various biological and metabolic processes by binding to the 3'-untranslated region of target mRNAs to facilitate mRNA degradation or inhibit translation. Chrysanthemum (*Chrysanthemum morifolium*) is one of the most important ornamental flowers with increasing demand each year. However, embryo abortion is the main reason for chrysanthemum cross breeding failure. To date, there have been no experiments examining the expression of miRNAs associated with chrysanthemum embryo development. Therefore, we sequenced three small RNA libraries to identify miRNAs and their functions. Our results will provide molecular insights into chrysanthemum embryo abortion.

### Results

Three small RNA libraries were built from normal chrysanthemum ovules at 12 days after pollination (DAP), and normal and abnormal chrysanthemum ovules at 18 DAP. We validated 228 miRNAs with significant changes in expression frequency during embryonic development. Comparative profiling revealed that 69 miRNAs exhibited significant differential expression between normal and abnormal embryos at 18 DAP. In addition, a total of 1037 miRNA target genes were predicted, and their annotations were defined by transcriptome data. Target genes associated with metabolic pathways were most highly represented according to the annotation. Moreover, 52 predicted target genes were identified to be associated with embryonic development, including 31 transcription factors and 21 additional genes. Gene ontology (GO) annotation also revealed that high-ranking miRNA target genes related to cellular processes and metabolic processes were involved in transcription regulation and the embryo developmental process.

**Competing Interests:** The authors have declared that no competing interests exist.

## Conclusions

The present study generated three miRNA libraries and gained information on miRNAs and their targets in the chrysanthemum embryo. These results enrich the growing database of new miRNAs and lay the foundation for the further understanding of miRNA biological function in the regulation of chrysanthemum embryo abortion.

## Introduction

microRNAs (miRNAs) are 21–24 nucleotide-long primary endogenous small RNAs that regulate gene expression at the translational level [1,2], including DNA elimination, mRNA cleavage, deadenylation and translational repression [3]. Generally, the miRNAs initially identified in plants, which have been found in many organisms, may serve as key signature molecules that regulate transcription factors and other genes in flowering plant development [4,5], such as flowering time, floral organ patterning and ovule development [6,7]. Based on their extensive integration within genetic networks, the mechanism for miRNA biogenesis in plants has been well investigated in *Arabidopsis thaliana* [8–10].

Chrysanthemum (*Chrysanthemum morifolium*) is an internationally recognized floricultural crop, is the second most important ornamental in the world and has a profound effect on flower production. In addition to aesthetic value, the chrysanthemum is used as a vegetable, in tea and medicine [11,12]. At present, hybridization is the most widely used conventional breeding program for producing new garden phenotypes and optimizing biotic and abiotic resistance, yet embryo abortion is ubiquitous and a primary limiting factor in cross breeding [13–15]. It is widely accepted that normal embryonic development is essential for successful reproduction. In fact, a considerable proportion of ovules fail to produce seeds in many species, even after successful fertilization. In the last few decades, the reproductive barrier has received increased attention. Whereas previous reports have primarily focused on morphological, anatomical [14], and physiological aspects [16–18], very limited information is available about the importance of post-transcriptional regulation (and posttranscriptional regulators) during this process [19]. Therefore, high-throughput sequencing of small RNA pools could provide insight.

Recently, great efforts have been made to identify miRNAs, their targets and functions, and large-scale sequencing projects have enriched the information of miRNAs and targets at both the sequence and expression level in different plant species. Meanwhile, significant progress has been made towards understanding the role of miRNAs in plant development. For instance, one study demonstrated that miR166/165 and its target genes regulate shoot apical meristem and floral development [20]. Other research concerning the importance of miRNA metabolism in normal plant development showed that miR396 controls carpel number and pistil development via regulation of the GRF/GIF (*GROWTH-REGULATING FACTOR/GRF-INTERACTING FACTOR*) complex [21]. In addition, some studies have clearly shown that constitutive miR159 or miR167 expression caused male sterility by reducing their target gene expression in *Arabidopsis* [22–24]. In embryo development research [25,26], cellular differentiation [27], embryonic pattern formation and developmental timing [28] have been reported, suggesting that they have important functions in embryonic development. In addition, more than 400 miRNA targets have been identified [29]. However, the crucial functions of most miRNAs that regulate embryo patterning are still unknown [30]. Hence, we explored the relationship between miRNAs and embryo abortion through high-throughput

sequencing. As a consequence, we revealed the expression level of numerous key miRNAs and their targets related to embryo abortion, which expands our understanding of the miRNA pathway in embryonic development.

## Methods

### Plant materials

*C. morifolium* 'Yuhualuoying' ( $2n = 6X = 54$ ) is a ground-cover chrysanthemum cultivar with highly excellent ornamental traits and important commercial quality, but weak resistance to several abiotic factors. *C. nankingense* ( $2n = 2X = 18$ ) is a wild species with strong adaptability, such as cold tolerance, and it is an important parent in chrysanthemum cross breeding. However, distant hybridization between cultivar and wild species is difficult. In this hybrid combination, the offspring failed to generate seeds and found that the vast majority of embryos aborted at 18 DAP. Here, 'Yuhualuoying' and *C. nankingense* were used as the female and male parents, respectively. They were maintained in the Chrysanthemum Germplasm Resource Preserving Centre, Nanjing Agricultural University, China ( $32^{\circ}05' N$ ,  $118^{\circ}90' E$ ). Interspecific crosses were performed according to previously described methods [13]. Sample collection was performed as described previously [31]. Briefly, 60 chrysanthemum plants were planted in three planting areas, with 20 plants in each area. At 12 days after pollination, when nearly all the embryos were normal and reached the globular phase, approximately 700 normal ovules were collected (approximately 0.2 g) from each planting area, and a total of more than 0.6 g ovules were collected at this stage. At 18 days after pollination, when normal embryos grew into heart-shaped embryos and abnormal embryos began degeneration, >0.6 g normal and abnormal ovules were collected. After collection, the three samples, normal embryos at 12 DAP (NE12), normal embryos at 18 DAP (NE18) and abortive embryos at 18 DAP (AE18), were immediately frozen in liquid nitrogen and stored at  $-80^{\circ}C$ .

### Total RNA preparation and small RNA library construction

Total RNA was extracted from three samples with Trizol reagent according to the manufacturer's protocol (Takara Bio Inc., Otsu, Japan). The integrity and purity of the total RNA was determined by an Agilent 2100 RNA 6000 Kit and electrophoresis on a 1% agarose gel. RNAs were stored at  $-80^{\circ}C$  until being used for small RNA sequencing.

### Small RNA library construction and high-throughput sequencing

The samples were subjected to 15% denaturing polyacrylamide gel electrophoresis and small RNAs with 18–30 nt fragments were purified. The small RNA molecules were sequentially ligated to 5' and 3' adaptors and were reversed transcribed into DNA by RT-PCR. Finally, three RT-PCR products were sequenced by the Beijing Genomics Institute (BGI) (Shenzhen, Guangdong Province, China) using the Solexa sequencing method, and three small RNA libraries were constructed. The deep-sequencing dataset has been deposited in NCBI, and the accession number is PRJNA268153.

### Bioinformatics analysis of sequencing data

The raw sequences, which are not always effective, were processed as described by Sunkar et al. [32]. The modified 18–30 nt sequences were obtained from the raw sequences by removing the adaptor sequences for further analyses. Firstly, rRNA, tRNA, snRNA, snoRNA and those containing a poly-A tail were omitted from the sRNA sequences, and then the remaining sequences were compared against the NCBI Genbank database and Rfam 11.0 [33] databases.

To identify conserved miRNAs in chrysanthemum embryos, the unique sRNA sequences were compared with the miRBase 19.0 [34] using a BlastN search. Only perfectly matched sequences were considered to be conserved miRNAs.

### Differential miRNA expression analysis related to embryo development

miRNA expression among the three samples was compared to identify differences in miRNA expression related to embryonic development, as follows: miRNA expression was normalized in the three samples (NE12, NE18 and AE18) to obtain the expression of transcript per million (TPM). Normalized expression = Actual miRNA count/Total count of clean reads\*1000000. Notably, if the miRNA gene expression was zero after normalization in any one of the two samples, then it was revised to 0.01; if the miRNA gene expression of the two samples was less than 1, it was not used in the analysis of differential expression because of low expression. The fold change between two samples was calculated as: fold change =  $\log_2$  (sample 1/sample 2) [35]. To clearly display the expression profile, a heatmap was generated using Cluster v3.0 software and visualized using Treeview [36].

### Prediction of potential chrysanthemum miRNA target mRNAs

To understand the molecular function of differentially expressed miRNAs in chrysanthemum embryos, miRNAs were analyzed using TargetScan [37] to predict their target mRNAs. Newly identified chrysanthemum miRNA sequences were used as custom miRNA sequences, and the chrysanthemum transcript library built from these was used as a custom plant database. A total of 615,312 contigs and 116,697 unigenes were identified, and all of them had the Nr, Nt, COG, GO and KEGG annotation. More details have been previously described in an article about chrysanthemum embryo transcriptomic analysis [31]. Genes were classified according to KEGG functional annotations using the DAVID bioinformatics resources [38]. Moreover, GO term enrichment of the target genes was calculated with the use of Gene Ontology (GO) project (<http://www.geneontology.org/>).

### Validation of miRNAs through real-time quantitative PCR (qRT-PCR)

To validate the high-throughput sequencing results of chrysanthemum embryo miRNAs, 21 differentially expressed miRNAs were randomly selected and analyzed by qRT-PCR. RNA samples were reverse-transcribed using PrimeScript miRNA qPCR starter kit ver 2.0 (Takara Bio). A final volume of 20  $\mu$ L was achieved by the addition of 5 pmol of the forward and the reverse primers (S1 Table). The conditions for the PCR amplification were as follows: polymerase activation at 95°C for 3 min, followed by 40 cycles of 95°C for 20 s, 60°C for 20 s and 72°C for 45 s. All reactions were performed in triplicate on a Mastercycler ep realplex device (Eppendorf, Hamburg, Germany) according to the kit's protocol. The *EF1 $\alpha$*  gene was used as the reference gene [39], and relative expression levels were calculated by the  $2^{-\Delta\Delta CT}$  method [40].

### Target validation by 5' RNA Ligase-Mediated Rapid Amplification of cDNA Ends (RLM-RACE)

To validate the predicted target cleavage sites, a modified procedure for RLM-RACE [41] was performed using the FirstChoice RLM-RACE Kit (Ambion, Austin, TX, USA). This protocol started with 2  $\mu$ g mixed total RNA from the three embryo samples. All reactions were performed using following steps: (i) 5' RACE adapter ligation. The components of reaction included 2  $\mu$ L total RNA (1000 ng/ $\mu$ L), 1  $\mu$ L 5' RACE adapter, 1  $\mu$ L 10X RNA ligase buffer, 2  $\mu$ L T4 RNA ligase (2.5 U/ $\mu$ L) and 4  $\mu$ L nuclease-free water, which were gently mixed, briefly spun,

and incubated at 37°C for one hour. (ii) Reverse transcription (RT). All reactions were carried out in a total volume of 20 µL, including 2 µL ligated RNA, 4 µL dNTP mix, 2 µL random decamers, 2 µL 10X RT buffer, 1 µL RNase inhibitor, and 1 µL M-MLV reverse transcriptase. After mixing and spinning, the reactions were incubated at 42°C for one hour. (iii) Nested PCR for 5' RLM-RACE. 5' RACE outer primer and gene-specific outer primer were used for outer 5' RLM-RACE. A total of 1 µL RT reaction mixed with 2.5 µL 10X PCR buffer, 2 µL dNTP mix, 1 µL 5' RACE gene-specific outer primer (10 µM) and 1 µL 5' RACE outer primer were added to a final volume of 25 µL. The conditions were as follows: initial denaturation at 94°C for 3 min, followed by 35 cycles of 94°C for 30 s, 60°C for 30 s, 72°C for 1 min, with a final extension at 72°C for 7 min. Nested PCR was performed using 1 µL outer PCR product, the 5' RACE inner primer, gene-specific inner primer and other components. The conditions were same as above for outer 5' RLM-RACE. The 5' RACE primer and gene-specific primers are shown in [S2 Table](#). After nested PCR, the 5' RACE products were purified using the Agarose Gel DNA Purification Kit (TaKaRa Bio), ligated into the pMD19-T vector (TaKaRa Bio), and sequenced [[42](#)].

## Results

### Construction of small RNA libraries by high-throughput sequencing

To identify miRNAs involved in chrysanthemum embryo development, we first used the high-throughput sequencing technique to construct three libraries from NE12, NE18 and AE18. A total of 10526337, 11922890 and 10663240 reads were obtained from the three libraries, respectively ([Table 1](#)), after filtering out reads without small RNA sequences. The sequences ranged from 18 to 30 nt in length ([Fig 1](#)), of which the majority were 19 to 25 nt long, and 24 nt small RNAs were most highly enriched in the three libraries. We next obtained clean reads after adaptor sequence removal, low quality tags, contaminants and short RNAs <18 nt, i.e., rRNA, snRNA, snoRNA, tRNA and unannotated reads ([Table 2](#)).

Deep sequencing results of the three libraries showed that the majority of small RNAs were 21–24 nt long, in agreement with the typical range for plant miRNAs, and 24 nt small RNAs were the most abundant. The abnormal 18 DAP embryos had the highest expression levels ([Fig 1](#)). However, the distribution of each category of small RNA was distinct in each of the three libraries. For example, NE12 expressed the highest number of miRNAs, while AE18 expressed the least. The proportion of snRNAs and tRNAs in AE18 was higher than the other two libraries ([Table 2](#)).

**Table 1. Summary of filtered data produced by small RNA sequencing.**

| Type                    | NE12     |             | NE18     |             | AE18     |             |
|-------------------------|----------|-------------|----------|-------------|----------|-------------|
|                         | Count    | Percent (%) | Count    | Percent (%) | Count    | Percent (%) |
| Total reads             | 10526337 |             | 11922890 |             | 10663240 |             |
| High quality            | 10406754 | 1           | 11797964 | 1           | 10544367 | 1           |
| 3' adapter null         | 17919    | 0.17        | 19688    | 0.17        | 20656    | 0.2         |
| Insert null             | 863      | 0.01        | 1454     | 0.01        | 806      | 0.01        |
| 5' adapter contaminants | 6565     | 0.06        | 5903     | 0.05        | 5982     | 0.06        |
| Smaller than 18 nt      | 195505   | 1.88        | 118586   | 1.01        | 128648   | 1.22        |
| PolyA                   | 484      | 0           | 1136     | 0.01        | 937      | 0.01        |
| Clean reads             | 10185418 | 97.87       | 11651197 | 98.76       | 10387338 | 98.51       |

doi:10.1371/journal.pone.0124371.t001

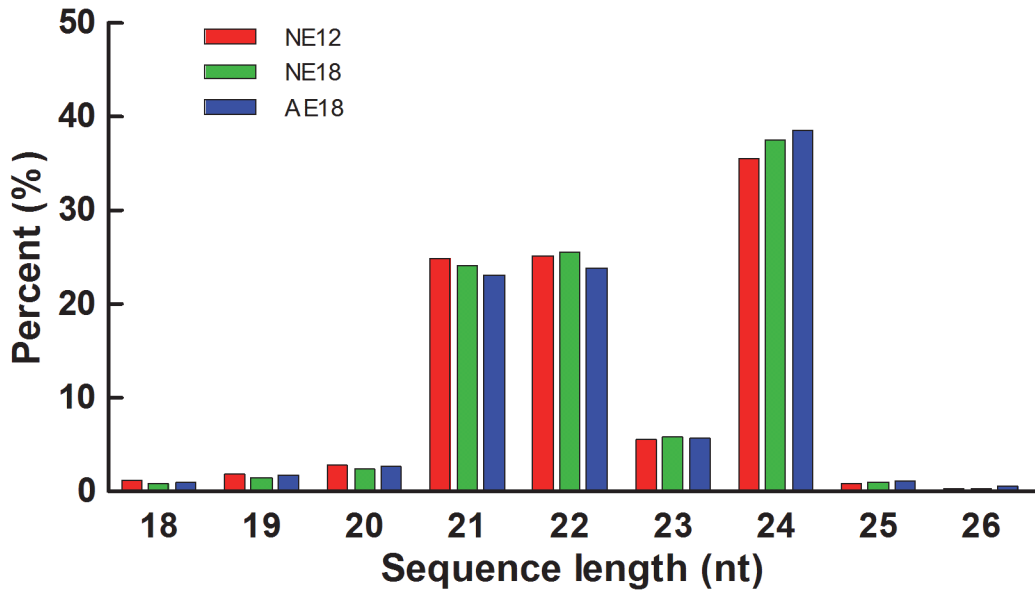

Fig 1. Lengths of unique small RNA sequences in chrysanthemum.

doi:10.1371/journal.pone.0124371.g001

### Identification of known miRNAs

To identify miRNA expression abundance in the chrysanthemum embryo, we compared the sRNA library to known plant miRNAs in miRBase 19.0 by BlastN. After sequence analysis allowing one or two mismatches between sequences, we identified 228 miRNAs in the three RNA libraries (S1 Dataset). By analyzing the number of these miRNA reads, we found that there were significant changes in their expression frequency.

### Differentially expressed miRNAs between normal and abnormal embryos

The outcome of sequence counts indicated that some miRNAs have relatively more counts, suggesting these miRNAs are preferentially expressed throughout embryonic development. For instance, miR166a, miR157a and miR156a had more than 7000 counts in the three libraries. In contrast, several other miRNAs showed specific expression in a subset of the libraries. For example, miR172b was only expressed in normal embryos (NE12), as its expression in NE18 and AE18 was zero, and miR1143-3p was highly expressed in NE12 and AE18, but had low

Table 2. Distribution of small RNAs among different categories in chrysanthemum.

| Category           | NE12         |             |             |             | NE18         |             |             |             | AE18         |             |             |             |
|--------------------|--------------|-------------|-------------|-------------|--------------|-------------|-------------|-------------|--------------|-------------|-------------|-------------|
|                    | Unique sRNAs | Percent (%) | Total sRNAs | Percent (%) | Unique sRNAs | Percent (%) | Total sRNAs | Percent (%) | Unique sRNAs | Percent (%) | Total sRNAs | Percent (%) |
| <b>Total</b>       | 3266988      | 100         | 10185418    | 100         | 3741798      | 100         | 11651197    | 100         | 3403142      | 100         | 10387338    | 100         |
| <b>miRNA</b>       | 10117        | 0.31        | 327244      | 3.21        | 9436         | 0.25        | 267683      | 2.3         | 8714         | 0.26        | 261684      | 2.52        |
| <b>rRNA</b>        | 43812        | 1.34        | 322625      | 3.17        | 59827        | 1.6         | 443510      | 3.81        | 57728        | 1.7         | 402156      | 3.87        |
| <b>snRNA</b>       | 935          | 0.03        | 1747        | 0.02        | 1139         | 0.03        | 2312        | 0.02        | 1146         | 0.03        | 2013        | 0.02        |
| <b>snoRNA</b>      | 232          | 0.01        | 352         | 0           | 375          | 0.01        | 639         | 0.01        | 337          | 0.01        | 555         | 0.01        |
| <b>tRNA</b>        | 7942         | 0.24        | 78453       | 0.77        | 9451         | 0.25        | 84273       | 0.72        | 12382        | 0.36        | 118948      | 1.15        |
| <b>Unannotated</b> | 3203950      | 98.07       | 9454997     | 92.83       | 3661570      | 97.86       | 10852780    | 93.15       | 3322835      | 97.64       | 9601982     | 92.44       |

doi:10.1371/journal.pone.0124371.t002

expression in NE18. To understand the expression of these known miRNAs, we employed differential expression analysis and cluster analysis of the 228 known miRNAs, and the results are listed in one heatmap (Fig 2).

To explore the specific miRNAs related to embryo development, we compared the normalized expression of miRNAs in the three small RNA libraries pairwise. All differentially expressed miRNAs with *p*-values less than 0.05 and expression levels greater than 2-fold-change are shown in S2 Dataset. We found that there were 85, 72 and 69 differentially expressed miRNAs in the following three comparisons: (a) NE12 vs. NE18; (b) NE12 vs. AE18; (c) NE18 vs. AE18, respectively (S2 Dataset).

## Target prediction for known miRNAs

To understand the biological function of these miRNAs, it is vital to identify their potential targets. We predicted a total of 1037 potential target genes for 129 identified miRNAs from the transcripts of chrysanthemum embryo libraries (Sheet 1 in S3 Dataset). All annotated information of these targets is provided (Sheet 2 in S3 Dataset). According to the Blastx results, sequences corresponding to the putative targets were associated with three ontologies in Gene Ontology (GO): molecular functions, cellular components and biological processes (Fig 3). In the three above-mentioned comparisons, the top four GO terms were cell, cell part, cellular process and metabolic process. On the contrary, few transcripts were annotated to genes involved in structural molecule activity.

In addition, miRNA target genes were related to transcription factors and embryo development. As a result, we identified 52 predicted target genes related to embryo development, including 31 transcription factors and 21 other genes (Tables 3 & 4). We found that the majority of the transcription factors are known, such as auxin response factor (ARF) family (regulated by miR160, 167, 414), which had the highest number, homeobox leucine-zipper protein (targeted by miR165 and miR166), MYB family (targeted by miR159, 319, 414, 1114, 5298, 5658), ethylene-responsive transcription factor (targeted by miR172), and WRKY DNA binding protein (regulated by miR5380) (Table 3). Moreover, GO enrichment analysis provided the main biological functions of the target genes. The results indicated that 21 genes participated in various reproductive processes, including embryonic pattern specification (GO:0009880), embryo development (GO:0009790), post-embryonic development (GO:0009791) and embryo development ending in seed dormancy (GO:0009793) (Table 4). In short, our prediction of potential targets indicated that these genes are involved in a wide range of plant biological processes during chrysanthemum embryo development.

## qRT-PCR validation of miRNA expression level

To validate the dynamic miRNA expression pattern identified by deep sequencing, we randomly selected 21 predicted candidate miRNAs from the three libraries and validated them by qRT-PCR. The expression patterns of the 21 miRNAs are shown in Fig 4, which had different expression patterns in the normal and abortive embryo. These miRNAs include miR414, miR847-5p, miR1436, miR2619a, and miR5813, all of which had a similarly high expression pattern in the normal embryo at 18 days. In comparison, the expression levels of miR1143-3p, miR9025-5p and miR5386 were higher in AE18 compared to NE18. Other miRNAs showed differential expression at different developmental stages. We compared the expression level of each miRNA in the three samples to its abundance (TPM) in the sequencing data of the three libraries. The results indicate that the qRT-PCR results of most miRNAs were consistent with the sequencing data (Fig 4).

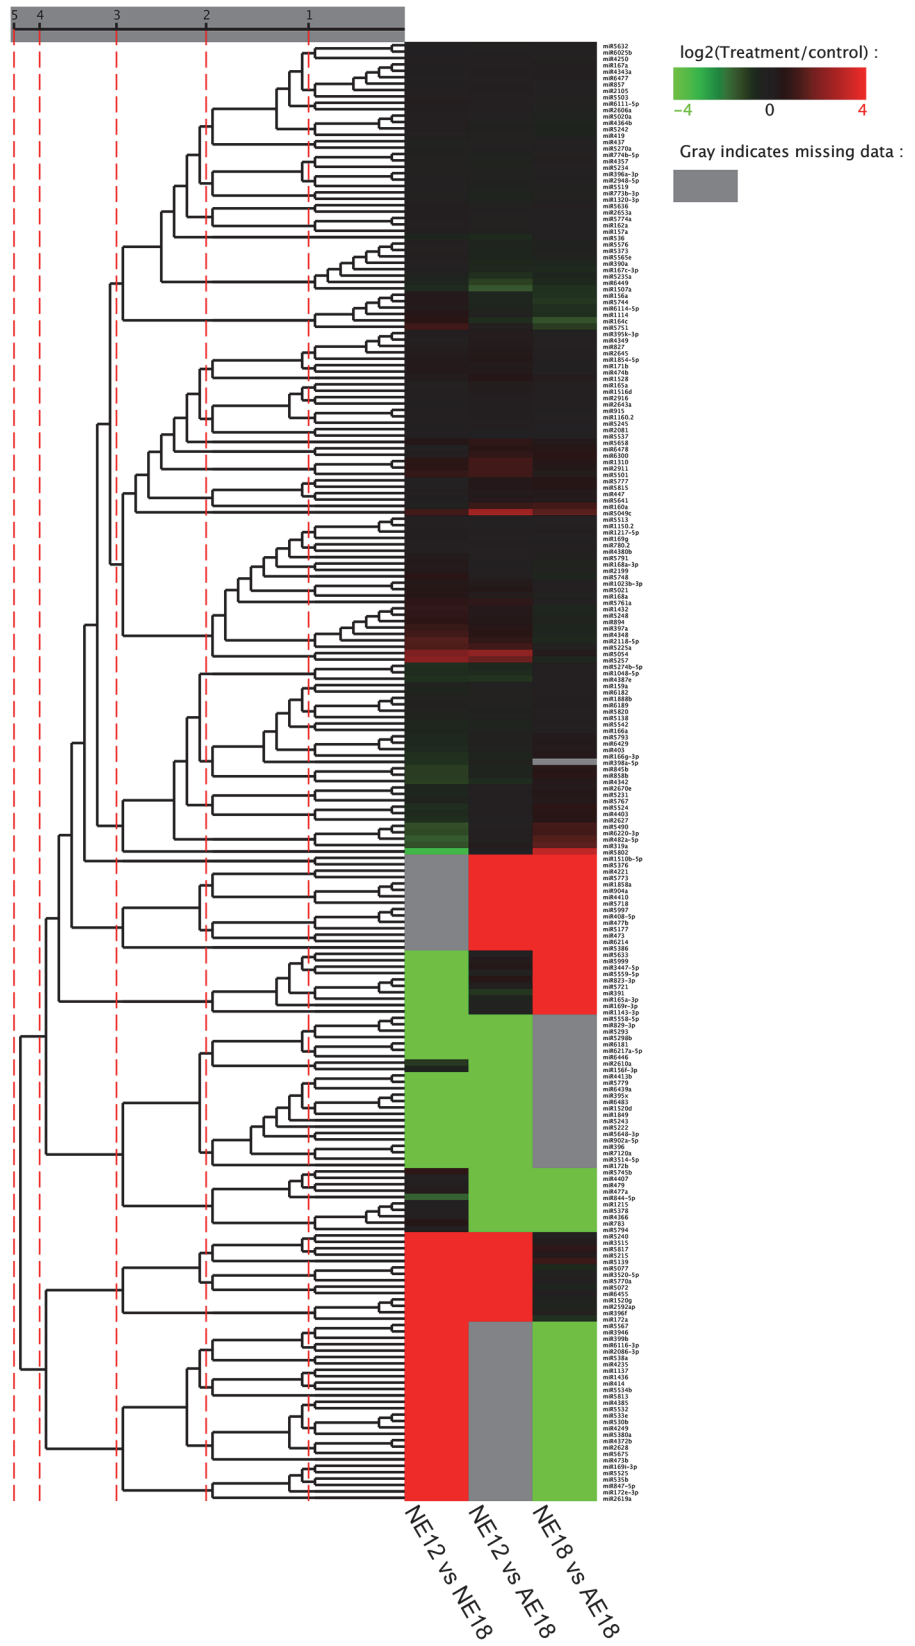



**Fig 2. Heatmap of differential expression analysis and cluster analysis of 228 known miRNAs between samples.** The bar represents the scale of the expression abundance for each miRNA ( $\log_2$  TPM of treatment/control) in three comparable groups as indicated by the red/green rectangles. Red rectangles represent up-regulation and green rectangles represent down-regulation. All information for each miRNA can be found in [S1 Dataset](#).

doi:10.1371/journal.pone.0124371.g002

## RLM-RACE validation of target prediction

In this study, we used 5' RLM-RACE to map the cleavage sites in four predicted target genes in chrysanthemum. CL7290.Contig1, Unigene29088, Unigene26402, and CL15279.Contig11 were confirmed as real targets of miR414, miR5380a, miR168a, and miR396, respectively, as all of the 5' ends of the mRNA fragments mapped to the nucleotide that paired to the tenth nucleotide of each miRNA with higher frequencies than depicted for each pairing oligo ([Fig 5](#)).

## Discussion

### Identification of chrysanthemum embryo small RNAs by high-throughput sequencing

miRNAs play essential roles in regulating plant growth and development. In recent years, high-throughput sequencing has provided an efficient method to quantitatively profile small RNA populations. Most conserved and novel miRNAs in plants have been identified, and the plant miRNA database that includes model plants and major crops has been established [43]. To our knowledge, miRNAs have been studied in field of plant reproductive biology. It has previously been suggested that miRNAs are key regulators of the embryonic maturation program, and they regulate the timing of embryogenesis in *Arabidopsis* [29]. The aim of this work was to identify specific miRNAs by high-throughput sequencing from normal and abnormal chrysanthemum embryos, and to analyze the differentially expressed miRNAs associated with embryo abortion. Here, we report that 24 nt sRNAs were most abundant in the chrysanthemum embryo library, which is consistent with those of *A. thaliana* [44], *Oryza sativa* [45], *Medicago truncatula* [46] and *Prunus mume* [35]. Other studies have found that 21nt sRNAs are the most abundant in *A. thaliana* [47] and other species [48,49]. These indicate that the small RNA transcriptome is complicated and significantly different in various plant species and organs.

### Identified miRNAs potentially regulate chrysanthemum embryo abortion

It is now clear that miRNA plays a variety of developmental roles during the plant life-cycle. Previous studies have demonstrated that miRNAs regulate the timing of embryo maturation in *Arabidopsis* [50], regulate hormone biosynthesis and morphogenesis [51]. In this study, we identified 228 known miRNAs from the chrysanthemum embryo by high-throughput sequencing, 129 of which provided information of target prediction from the chrysanthemum embryo transcriptome [31]. Recently, multiple studies have shown that many conserved miRNAs, such as miR156, miR159, miR166, miR167a, miR169, miR390, miR396, and miR397, play regulatory roles during embryonic development [50,52,53]. In a study of *A. thaliana* embryonic tissue, the expression pattern of miR396 displayed uniform accumulation in longitudinal sections of the mature green-stage embryo [54]. Here, we found that the miR396 only appeared in normal embryos at 12 days after pollination, when most embryos had reached the globular stage, suggesting that miR396 is related to early embryonic developmental stages. Moreover, we found that miR169r-3p, miR172a, miR172b, miR414, miR482a-5p, miR535b, miR1143-3p, miR2118-5p, miR5054, miR5721, and miR7120a were differentially expressed at different stages of embryo

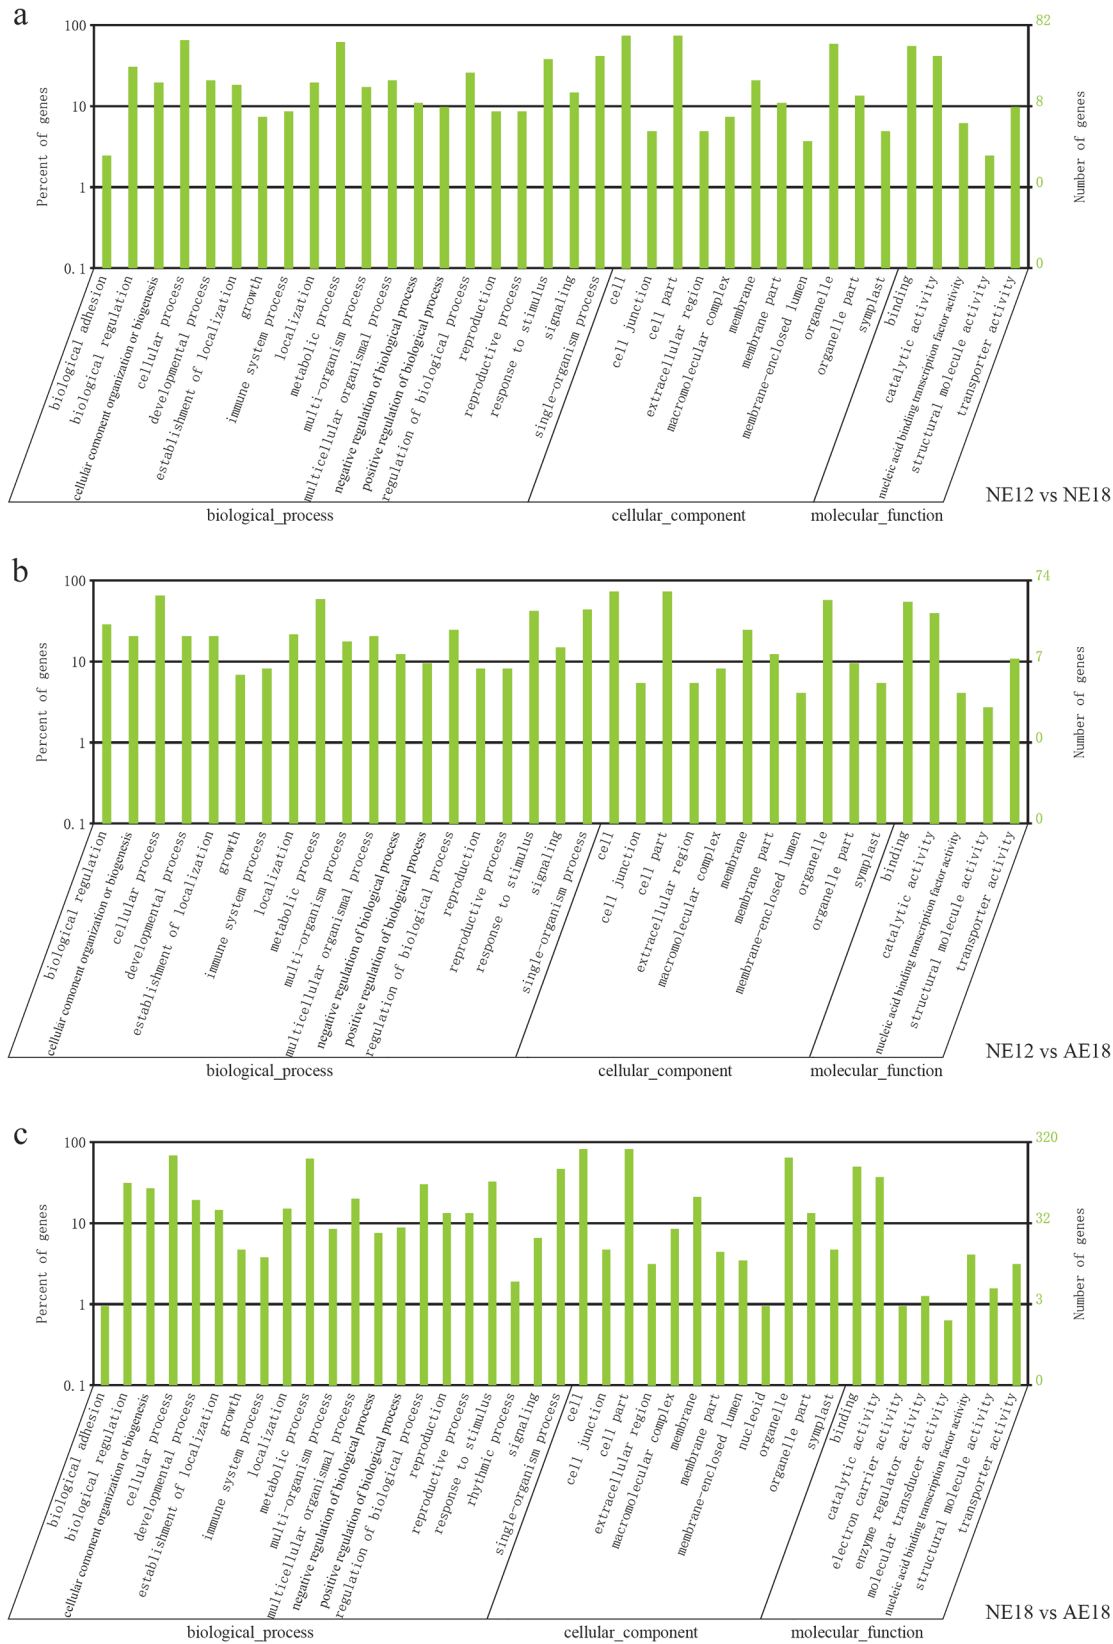

**Fig 3. Gene Ontology (GO) classifications of putative targets in the chrysanthemum embryo.**

doi:10.1371/journal.pone.0124371.g003

**Table 3. Identified candidate transcription factor targets of miRNAs during chrysanthemum embryogenesis.**

| miRNA           | Target gene ID       | NE2_FPKM | NE18_FPKM | AE18_FPKM          | annotation                                           |
|-----------------|----------------------|----------|-----------|--------------------|------------------------------------------------------|
| miR159          | CL9206.Contig1_All   | 8.8268   | 6.6441    | 5.7653             | GAMYB-like2                                          |
| miR160          | CL6013.Contig2_All   | 25.4787  | 21.3715   | 17.7767            | auxin response factor 18                             |
|                 | Unigene17545_All     | 26.0161  | 21.019    | 19.025             | auxin response factor 10                             |
|                 | Unigene374_All       | 12.8624  | 8.336     | 8.1864             | auxin response factor                                |
|                 | Unigene7539_All      | 7.7804   | 11.3549   | 13.5256            | auxin response factor 16                             |
| miR165          | CL2494.Contig1_All   | 17.2011  | 14.7895   | 13.3594            | homeobox leucine-zipper protein                      |
| miR166          | CL1275.Contig3_All   | 13.1222  | 6.1693    | 4.7337             | homeobox leucine-zipper protein                      |
|                 | CL2494.Contig1_All   | 17.2011  | 14.7895   | 13.3594            | homeobox leucine-zipper protein                      |
| miR167          | CL1486.Contig3_All   | 1.7527   | 1.5281    | 1.474              | auxin response factor 1                              |
|                 | Unigene13456_All     | 38.8213  | 26.3134   | 30.6115            | auxin response factor 6                              |
|                 | Unigene3472_All      | 0.6448   | 0.3355    | 0.2665             | auxin response factor 1                              |
|                 | Unigene3474_All      | 5.8209   | 3.5086    | 3.3267             | auxin response factor 1                              |
| miR172          | CL12144.Contig2_All  | 3.6013   | 2.0811    | 2.824              | ethylene-responsive transcription factor RAP2-7-like |
| miR319          | CL9206.Contig1_All   | 8.8268   | 6.6441    | 5.7653             | GAMYB-like2                                          |
| miR414          | CL11642.Contig1_All  | 89.5743  | 81.5577   | 83.1779            | Zinc finger protein                                  |
|                 | CL2007.Contig4_All   | 2.8762   | 4.4129    | 3.3445             | calmodulin-binding transcription factor SR2L         |
|                 | CL7290.Contig1_All   | 16.3852  | 14.6688   | 16.6145            | ATERF3/ERF3                                          |
|                 | Unigene1442_All      | 6.7029   | 13.6356   | 10.7171            | SAC51 transcription factor                           |
|                 | Unigene5061_All      | 162.267  | 100.757   | 94.5308            | MADS-box transcription factor CDM104                 |
|                 | Unigene5423_All      | 45.6283  | 54.7193   | 56.8421            | bHLH122                                              |
|                 | Unigene630_All       | 49.7407  | 100.5877  | 133.5406           | auxin response factor 19                             |
|                 | Unigene8542_All      | 4.5087   | 3.9645    | 4.4534             | bHLH110-like                                         |
| Unigene9425_All | 2.1801               | 1.0677   | 1.2358    | Myb-like protein A |                                                      |
| miR894          | CL7400.Contig1_All   | 3.0342   | 2.1561    | 2.7542             | WUSCHEL-related homeobox 13-like                     |
| miR1114         | Unigene17113_All     | 2.9068   | 5.5519    | 3.9821             | MYB2                                                 |
|                 | Unigene47172_All     | 3.9374   | 14.8477   | 13.206             | MYB68                                                |
| miR2606         | CL13855.Contig12_All | 1.8751   | 0.7562    | 1.0421             | APETALA2                                             |
| miR5298         | CL4971.Contig2_All   | 5.7086   | 2.8565    | 3.9865             | Myb family protein-like protein                      |
| miR5380         | Unigene12888_All     | 0        | 0.2626    | 0.1689             | WRKY DNA binding protein                             |
|                 | Unigene29088_All     | 0        | 0.087     | 0                  | WRKY DNA binding protein                             |
| miR5658         | CL4971.Contig2_All   | 5.7086   | 2.8565    | 3.9865             | Myb family protein-like protein                      |

doi:10.1371/journal.pone.0124371.t003

development. In a similar study of *Raphanus sativus* [55], miR169r-3p and miR535b were detected only in the library of 4–15 day after pollinated ovules, while they were not expressed in 0 day after pollinated ovules. As shown, miR169r-3p was repressed in NE18, but it was expressed in AE18. In contrast, miR414 and miR535b displayed the opposite expression pattern, as they were more highly expressed in NE18. The miRNAs with these changes likely have targets that play critical roles in chrysanthemum embryo development, even at the abortion stage. More importantly, we identified some novel and unconserved miRNAs, such as miR3520-5p and miR5054, which significantly increased in embryos at 18 DAP, indicating that these miRNAs may be responsible for embryo morphogenesis and maturation.

### Functions of predicted target genes during chrysanthemum embryo development

miRNAs and their potential targets prediction could provide information about the biological processes regulated by miRNAs. Most miRNAs exert their biochemical or biophysical effects

**Table 4. Identified candidate miRNA targets associated with embryo development.**

| miRNA      | Target gene ID           | NE12_FPKM | NE18_FPKM | AE18_FPKM | annotation                                                    | GO-Biological Process                                                                                        |
|------------|--------------------------|-----------|-----------|-----------|---------------------------------------------------------------|--------------------------------------------------------------------------------------------------------------|
| miR168     | Unigene26402_All         | 50.0516   | 37.365    | 33.2644   | AGO1-1                                                        | GO:0009880// embryonic pattern specification                                                                 |
|            | Unigene33573_All         | 13.3169   | 9.6999    | 9.4405    | AGO1-1                                                        | GO:0009880// embryonic pattern specification                                                                 |
| miR396     | CL15279.<br>Contig11_All | 13.8518   | 9.3287    | 8.9313    | RNA-dependent RNA polymerase 5                                | GO:0009793// embryo development ending in seed dormancy                                                      |
| miR414     | CL13418.<br>Contig10_All | 4.7248    | 8.388     | 6.5565    | DNA polymerase epsilon catalytic subunit A                    | GO:0009793// embryo development ending in seed dormancy                                                      |
|            | CL4347.<br>Contig1_All   | 5.7647    | 3.5528    | 2.3867    | 26S proteasome non-ATPase regulatory subunit 4-like isoform 2 | GO:0048569// post-embryonic organ development                                                                |
|            | CL4558.<br>Contig1_All   | 7.635     | 5.4736    | 6.0619    | thiosulfate sulfurtransferase                                 | GO:0009793// embryo development ending in seed dormancy                                                      |
|            | CL5512.<br>Contig1_All   | 2.4496    | 2.5036    | 1.8112    | DNA replication licensing factor mcm2                         | GO:0009790// embryo development                                                                              |
|            | Unigene1949_All          | 50.2206   | 38.0872   | 36.5404   | RNA-binding protein, contains THUMP domain                    | GO:0009793// embryo development ending in seed dormancy;<br>GO:0009560// embryo sac egg cell differentiation |
|            | Unigene6954_All          | 11.1434   | 6.1588    | 6.4912    | histone arginine demethylase JMJD6                            | GO:0009793// embryo development ending in seed dormancy                                                      |
|            | Unigene8527_All          | 29.4372   | 20.146    | 24.2973   | Chloroplastic group IIA intron splicing facilitator CRS1      | GO:0009793// embryo development ending in seed dormancy                                                      |
| miR1114    | Unigene3202_All          | 4.9467    | 2.4764    | 3.8427    | Separin                                                       | GO:0009793// embryo development ending in seed dormancy                                                      |
| miR5234    | Unigene16643_All         | 5.8117    | 4.0253    | 3.6867    | protein embryo defective 1703                                 | GO:0009793// embryo development ending in seed dormancy                                                      |
| miR5567    | Unigene11829_All         | 2.0712    | 1.9773    | 1.8577    | ARID and Hsp20 domains containing protein                     | GO:0009560// embryo sac egg cell differentiation                                                             |
| miR5576    | Unigene8468_All          | 12.2968   | 6.6835    | 6.7827    | EMB2410                                                       | GO:0009793// embryo development ending in seed dormancy                                                      |
| miR5641    | CL1036.<br>Contig2_All   | 0.8155    | 0.4992    | 0.5136    | splicing factor 3A subunit 3-like                             | GO:0009793// embryo development ending in seed dormancy                                                      |
|            | Unigene10751_All         | 8.0763    | 5.0022    | 6.3961    | arginyl-tRNA synthetase-like                                  | GO:0009793// embryo development ending in seed dormancy                                                      |
| miR5813    | Unigene23217_All         | 16.1426   | 13.3944   | 15.5322   | Helicase                                                      | GO:0009793// embryo development ending in seed dormancy                                                      |
| miR6111-5p | Unigene14608_All         | 3.4383    | 3.1905    | 3.8469    | receptor-like kinase                                          | GO:0009791// post-embryonic development                                                                      |
| miR6182    | CL14437.<br>Contig1_All  | 1.2063    | 0.9108    | 1.1397    | flowering time control protein FCA                            | GO:0009791// post-embryonic development; GO:0009790// embryo development                                     |
| miR6189    | Unigene20704_All         | 23.6094   | 22.8058   | 21.6907   | protein phosphatase 1 regulatory subunit 11-like              | GO:0009790// embryo development                                                                              |
| miR6439    | CL7205.<br>Contig2_All   | 14.7975   | 12.0563   | 11.9233   | 14-3-3 family protein                                         | GO:0009791// post-embryonic development                                                                      |

doi:10.1371/journal.pone.0124371.t004

through downstream targets. High-throughput sequencing and bioinformatics have provided us reliable and efficient approaches in several plant species [53,56]. In plants, a dominant portion of target transcripts share short highly complementary regions called target sites with their regulatory miRNAs, through which the targets are silenced [57]. Therefore, we performed 5'



Target genes involved metabolic pathways were highly represented. For example, CL13855.Contig2\_All (GO:0044237//cellular metabolic process) had the least expression in AE18, about half the expression in NE12. It has been shown that genes with metabolic activity were expressed during Arabidopsis embryo development [59]. Furthermore, our previous report illustrated that most genes and proteins associated with energy metabolism were significantly down-regulated in AE18 [31]. These predicted target genes displayed temporal expression patterns in normal and abnormal embryos, further confirming the importance of energy metabolism during embryo development.

In *A. thaliana*, the phytohormone auxin is an important patterning agent during embryogenesis and post-embryonic development, and it exerts its effects through transcriptional regulation [60,61]. BODENLOS (BDL) and its interacting ARF partner ARF5 play a pivotal role during the earliest stages of embryonic development [62,63], while the HOMEODOMAIN--LEUCINE ZIPPER (HD-ZIP) transcription factor HB5 negatively regulates *BDL* expression. In our results, auxin response factor (ARF) 1, 6, 10, 16, 18, 19 and homeobox leucine-zipper protein were putative miRNA targets during chrysanthemum embryogenesis (Table 3), which suggest a regulation model in which miRNAs may participate in the crosstalk between these factors. In addition, homozygous *monopteros* mutants with mutations in an ARF gene show defects in the development of the basal region of the embryo, leading to seedlings that sometimes possess only a single cotyledon after germination [62]. Our results show that ARF1 expression (Unigene3472\_All, Unigene3474\_All and CL1486.Contig3\_All) was highest in NE12, but lowest in AE18. However, there was no significant difference between other ARFs, suggesting that the ARF1 may play a common role in auxin response in early embryonic development. Other transcription factor families also play important roles in embryonic development, including ethylene-responsive transcription factor [64], MYB [65], WRKY [66] and MADS-box [67,68] transcription factor. We identified the members of these transcription factor families as candidate miRNA targets during chrysanthemum embryogenesis.

In addition to transcription factors, other target genes also participate in embryo development. Previous reports have shown that the argonaute protein family is a key player in small RNA-guided gene-silencing pathways [69]. In Arabidopsis, the ARGONAUTE1 (AGO1) protein acts in the miRNA pathway and is broadly expressed in development [70], while ago1 loss-of-function mutants display pleiotropic defects in development and virus defense [71]. In *Drosophila*, argonaute-2 (*ago-2*) is required for proper nuclear migration, pole cell formation, and cellularization during early embryonic development [72]. As shown here, *miR168* was more highly expressed in NE18 than NE12, however, its target gene *AGO1* was more highly expressed in NE12, suggesting that *miR168* may have regulatory roles in embryo development.

## Conclusions

In conclusion, small RNA sequencing and the discovery of different microRNAs provide an extensive perspective into chrysanthemum embryo abortion. Sequence analyses and qRT-PCR validation revealed that some miRNAs have distinct expression levels at different stages of embryo development and are potentially significant to embryo abortion. Prediction and annotation of miRNAs-mediated targets provided favorable information for the future study of gene function, which will provide new insights into the mechanism of embryo development and offer new information about factors that regulate embryo abortion in plants. Moreover, GO categorization and enrichment analysis of differentially expressed genes demonstrate that several transcripts are required for chrysanthemum embryo development. Taken together, our investigation provides valuable information for further functional characterization of miRNAs related to plant embryo development.

## Supporting Information

### S1 Dataset. Known miRNAs in three libraries.

(XLS)

### S2 Dataset. Differentially expressed miRNAs.

(XLS)

### S3 Dataset. Identified miRNAs and their potential target.

(XLS)

### S1 Table. Primers used for qRT-PCR.

(PDF)

### S2 Table. 5' RACE PCR primer sequences used.

(PDF)

## Author Contributions

Conceived and designed the experiments: NJT FJZ FDC WMF. Performed the experiments: FJZ WD LLH APS HBW. Analyzed the data: FJZ NJT APS HBW. Contributed reagents/materials/analysis tools: NJT FDC WMF. Wrote the paper: NJT FJZ.

## References

1. Vasudevan S, Tong Y, Steitz JA. Switching from repression to activation: microRNAs can up-regulate translation. *Science*. 2007; 318: 1931–1934. PMID: [18048652](#)
2. Place RF, Li LC, Pookot D, Noonan EJ, Dahiya R. MicroRNA-373 induces expression of genes with complementary promoter sequences. *Proc Natl Acad Sci U S A*. 2008; 105: 1608–1613. doi: [10.1073/pnas.0707594105](#) PMID: [18227514](#)
3. Mallory AC, Vaucheret H. Functions of microRNAs and related small RNAs in plants. *Nat Genet*. 2006; 38: S31–S36. PMID: [16736022](#)
4. Llave C, Kasschau KD, Rector MA, Carrington JC. Endogenous and silencing-associated small RNAs in plants. *Plant Cell*. 2002; 14: 1605–1619. PMID: [12119378](#)
5. Ehrenreich IM, Purugganan M. MicroRNAs in plants. *Plant Signal Behav*. 2008; 3: 829–830. PMID: [19704512](#)
6. Schauer SE, Jacobsen SE, Meinke DW, Ray A. *DICER-LIKE1*: blind men and elephants in *Arabidopsis* development. *Trends Plant Sci*. 2002; 7: 487–491. PMID: [12417148](#)
7. Golden TA, Schauer SE, Lang JD, Pien S, Mushegian AR, Grossniklaus U, et al. *Short Integuments1/suspensor1/carpel Factory*, a Dicer homolog, is a maternal effect gene required for embryo development in *Arabidopsis*. *Plant Physiol*. 2002; 130: 808–822. PMID: [12376646](#)
8. Mallory AC, Elmayer T, Vaucheret H. MicroRNA maturation and action—the expanding roles of ARGONAUTES. *Curr Opin Plant Biol*. 2008; 11: 560–566. doi: [10.1016/j.pbi.2008.06.008](#) PMID: [18691933](#)
9. Xie Z, Khanna K, Ruan S. Expression of microRNAs and its regulation in plants. Elsevier; 2010. pp. 790–797.
10. Yamaguchi A, Abe M. Regulation of reproductive development by non-coding RNA in *Arabidopsis*: to flower or not to flower. *J Plant Res*. 2012; 125: 693–704. doi: [10.1007/s10265-012-0513-7](#) PMID: [22836383](#)
11. Anderson NO. *Chrysanthemum*. flower breeding and genetics: Issues, challenges and opportunities for the 21st century. Springer, New York; 2006. pp. 389–437.
12. Chen J. Classification system for Chinese flower cultivars. China Forestry Press, Peking; 2001.
13. Sun CQ, Chen FD, Teng NJ, Liu ZL, Fang WM, Hou XL. Interspecific hybrids between *Chrysanthemum grandiflorum* (Ramat.) Kitamura and *C. indicum* (L.) Des Moul. and their drought tolerance evaluation. *Euphytica*. 2010; 174: 51–60.
14. Sun C, Chen F, Teng N, Liu Z, Fang W, Hou X. Factors affecting seed set in the crosses between *Dendranthema grandiflorum* (Ramat.) Kitamura and its wild species. *Euphytica*. 2010; 171: 181–192. PMID: [21278926](#)

15. Johri B, Srivastava P, Singh N. Reproductive biology of angiosperms. *Reproductive Biology of Plants*: Springer; 2001. pp. 237–272.
16. Franz R, Jolliff G, Seddigh M. Embryo abortion in three meadowfoam genotypes. *Crop Sci.* 1991; 31: 1651–1654.
17. Arathi H, Ganeshiah K, Shaanker RU, Hegde S. Factors affecting embryo abortion in *Syzygium cumini* (L.) Skeels (Myrtaceae). *Int J Plant Sci.* 1996; 157(1): 49–52.
18. Ndoutoumou PN, Toussaint A, Baudoin JP. Embryo abortion and histological features in the interspecific cross between *Phaseolus vulgaris* L. and *P. coccineus* L. *Plant Cell Tiss Org.* 2007; 88: 329–332.
19. Seefried WF, Willmann MR, Clausen RL, Jenik PD. Global regulation of embryonic patterning in *Arabidopsis* by microRNAs. *Plant Physiol.* 2014; 165: 670–687. PMID: [24784759](#)
20. Jung JH, Park CM. *MIR166/165* genes exhibit dynamic expression patterns in regulating shoot apical meristem and floral development in *Arabidopsis*. *Planta.* 2007; 225: 1327–1338. PMID: [17109148](#)
21. Liang G, He H, Li Y, Wang F, Yu D. Molecular mechanism of microRNA396 mediating pistil development in *Arabidopsis*. *Plant Physiol.* 2014; 164: 249–258. doi: [10.1104/pp.113.225144](#) PMID: [24285851](#)
22. Achard P, Herr A, Baulcombe DC, Harberd NP. Modulation of floral development by a gibberellin-regulated microRNA. *Development.* 2004; 131: 3357–3365. PMID: [15226253](#)
23. Ru P, Xu L, Ma H, Huang H. Plant fertility defects induced by the enhanced expression of microRNA167. *Cell Res.* 2006; 16: 457–465. PMID: [16699541](#)
24. Wu MF, Tian Q, Reed JW. *Arabidopsis microRNA167* controls patterns of *ARF6* and *ARF8* expression, and regulates both female and male reproduction. *Development.* 2006; 133: 4211–4218. PMID: [17021043](#)
25. Baroux C, Spillaneand C, Grossniklaus U. 6 Genomic imprinting during seed development. *Adv Genet.* 2002; 46: 165–214. PMID: [11931224](#)
26. Vashisht D, Nodine M. MicroRNA functions in plant embryos. *Biochem Soc T.* 2014; 42: 352–357. doi: [10.1042/BST20130252](#) PMID: [24646243](#)
27. Nodine MD, Bartel DP. MicroRNAs prevent precocious gene expression and enable pattern formation during plant embryogenesis. *Genes Dev.* 2010; 24: 2678–2692. doi: [10.1101/gad.1986710](#) PMID: [21123653](#)
28. Duarte GT, Matioli CC, Pant BD, Schlereth A, Scheible WR, Stitt M, et al. Involvement of microRNA-related regulatory pathways in the glucose-mediated control of *Arabidopsis* early seedling development. *J Exp Bot.* 2013; 64: 4301–4312. doi: [10.1093/jxb/ert239](#) PMID: [23997203](#)
29. Willmann MR, Mehalick AJ, Packer RL, Jenik PD. MicroRNAs regulate the timing of embryo maturation in *Arabidopsis*. *Plant Physiol.* 2011; 155: 1871–1884. doi: [10.1104/pp.110.171355](#) PMID: [21330492](#)
30. Wu G. Plant microRNAs and development. *J Genet Genomics.* 2013; 40: 217–230. doi: [10.1016/j.jgg.2013.04.002](#) PMID: [23706297](#)
31. Zhang F, Wang Z, Dong W, Sun C, Wang H, Song A, et al. Transcriptomic and proteomic analysis reveals mechanisms of embryo abortion during chrysanthemum cross breeding. *Sci Rep.* 2014; 4: 6536. doi: [10.1038/srep06536](#) PMID: [25288482](#)
32. Sunkar R, Zhou X, Zheng Y, Zhang W, Zhu J. Identification of novel and candidate miRNAs in rice by high throughput sequencing. *BMC Plant Biol.* 2008; 8: 25. doi: [10.1186/1471-2229-8-25](#) PMID: [18312648](#)
33. Burge SW, Daub J, Eberhardt R, Tate J, Barquist L, Nawrocki EP, et al. Rfam 11.0: 10 years of RNA families. *Nucleic Acids Res.* 2012; 41: D226–232. doi: [10.1093/nar/gks1005](#) PMID: [23125362](#)
34. Kozomara A, Griffiths Jones S. miRBase: annotating high confidence microRNAs using deep sequencing data. *Nucleic Acids Res.* 2013; 42: D68–73. doi: [10.1093/nar/gkt1181](#) PMID: [24275495](#)
35. Gao Z, Shi T, Luo X, Zhang Z, Zhuang W, Wang, L. High-throughput sequencing of small RNAs and analysis of differentially expressed microRNAs associated with pistil development in Japanese apricot. *BMC Genomics.* 2012; 13: 371. doi: [10.1186/1471-2164-13-371](#) PMID: [22863067](#)
36. Song A, An J, Guan Z, Jiang J, Chen F, Lou W, et al. The constitutive expression of a two transgene construct enhances the abiotic stress tolerance of chrysanthemum. *Plant Physiol Biochem.* 2014; 80: 114–120. doi: [10.1016/j.plaphy.2014.03.030](#) PMID: [24751398](#)
37. Lewis BP, Shih I-h, Jones-Rhoades MW, Bartel DP, Burge CB. Prediction of mammalian microRNA targets. *Cell.* 2003; 115: 787–798. PMID: [14697198](#)
38. Dennis G Jr, Sherman BT, Hosack DA, Yang J, Gao W, Lane HC, et al. DAVID: database for annotation, visualization, and integrated discovery. *Genome Biol.* 2003; 4: P3. PMID: [12734009](#)
39. Liu H, Tian X, Li Y, Wu C, Zheng C. Microarray-based analysis of stress-regulated microRNAs in *Arabidopsis thaliana*. *RNA.* 2008; 14: 836–843. doi: [10.1261/rna.895308](#) PMID: [18356539](#)



40. Song A, Li P, Jiang J, Chen S, Li H, Zeng J, et al. Phylogenetic and transcription analysis of Chrysanthemum WRKY transcription factors. *Int J Mol Sci*. 2014; 15: 14442–14455. doi: [10.3390/ijms150814442](https://doi.org/10.3390/ijms150814442) PMID: [25196345](https://pubmed.ncbi.nlm.nih.gov/25196345/)
41. German MA, Pillay M, Jeong D-H, Hetawal A, Luo S, Janardhanan P, et al. Global identification of microRNA–target RNA pairs by parallel analysis of RNA ends. *Nat Biotechnol*. 2008; 26: 941–946. doi: [10.1038/nbt1417](https://doi.org/10.1038/nbt1417) PMID: [18542052](https://pubmed.ncbi.nlm.nih.gov/18542052/)
42. Song A, Lu J, Jiang J, Chen S, Guan Z, Fang W, et al. Isolation and characterisation of *Chrysanthemum crassum* *SOS1*, encoding a putative plasma membrane Na<sup>+</sup>/H<sup>+</sup> antiporter. *Plant Biol*. 2012; 14: 706–713.
43. Zhang Z, Yu J, Li D, Zhang Z, Liu F, Zhou X, et al. PMRD: plant microRNA database. *Nucleic Acids Res*. 2010; 38: D806–D813. doi: [10.1093/nar/gkp818](https://doi.org/10.1093/nar/gkp818) PMID: [19808935](https://pubmed.ncbi.nlm.nih.gov/19808935/)
44. Lu C, Tej SS, Luo S, Haudenschild CD, Meyers BC, Green PJ. Elucidation of the small RNA component of the transcriptome. *Science*. 2005; 309: 1567–1569. PMID: [16141074](https://pubmed.ncbi.nlm.nih.gov/16141074/)
45. Morin RD, Aksay G, Dolgosheina E, Ehardt HA, Magrini V, Mardis ER, et al. Comparative analysis of the small RNA transcriptomes of *Pinus contorta* and *Oryza sativa*. *Genome Res*. 2008; 18: 571–584. doi: [10.1101/gr.6897308](https://doi.org/10.1101/gr.6897308) PMID: [18323537](https://pubmed.ncbi.nlm.nih.gov/18323537/)
46. Wang T, Chen L, Zhao M, Tian Q, Zhang W. Identification of drought-responsive microRNAs in *Medicago truncatula* by genome-wide high-throughput sequencing. *BMC Genomics*. 2011; 12: 367. doi: [10.1186/1471-2164-12-367](https://doi.org/10.1186/1471-2164-12-367) PMID: [21762498](https://pubmed.ncbi.nlm.nih.gov/21762498/)
47. Rajagopalan R, Vaucheret H, Trejo J, Bartel DP. A diverse and evolutionarily fluid set of microRNAs in *Arabidopsis thaliana*. *Genes Dev*. 2006; 20: 3407–3425. PMID: [17182867](https://pubmed.ncbi.nlm.nih.gov/17182867/)
48. Schmutz J, Cannon SB, Schlueter J, Ma J, Mitros T, Nelson W, et al. Genome sequence of the palaeopolyploid soybean. *Nature*. 2010; 463: 178–183. doi: [10.1038/nature08670](https://doi.org/10.1038/nature08670) PMID: [20075913](https://pubmed.ncbi.nlm.nih.gov/20075913/)
49. Liang C, Zhang X, Zou J, Xu D, Su F, Ye N. Identification of miRNA from *Porphyra yezoensis* by high-throughput sequencing and bioinformatics analysis. *PLoS One*. 2010; 5: e10698. doi: [10.1371/journal.pone.0010698](https://doi.org/10.1371/journal.pone.0010698) PMID: [20502668](https://pubmed.ncbi.nlm.nih.gov/20502668/)
50. Willmann MR, Mehalick AJ, Packer RL, Jenik PD. MicroRNAs regulate the timing of embryo maturation in *Arabidopsis*. *Plant Physiol*. 2011; 155: 1871–1884. doi: [10.1104/pp.110.171355](https://doi.org/10.1104/pp.110.171355) PMID: [21330492](https://pubmed.ncbi.nlm.nih.gov/21330492/)
51. Chen X. Small RNAs and their roles in plant development. *Annu Rev Cell Dev*. 2009; 5: 21–44.
52. Buxdorf K, Hendelman A, Stav R, Lapidot M, Ori N, Arazi T. Identification and characterization of a novel miR159 target not related to MYB in tomato. *Planta*. 2010; 232: 1009–1022. doi: [10.1007/s00425-010-1231-9](https://doi.org/10.1007/s00425-010-1231-9) PMID: [20661587](https://pubmed.ncbi.nlm.nih.gov/20661587/)
53. Zhang J, Zhang S, Han S, Wu T, Li X, Li W, et al. Genome-wide identification of microRNAs in larch and stage-specific modulation of 11 conserved microRNAs and their targets during somatic embryogenesis. *Planta*. 2012; 236: 647–657. doi: [10.1007/s00425-012-1643-9](https://doi.org/10.1007/s00425-012-1643-9) PMID: [22526500](https://pubmed.ncbi.nlm.nih.gov/22526500/)
54. Ágyi Á, Havelda Z. Analysis of gradient-like expression of miR167 in *Arabidopsis thaliana* embryonic tissue. *J Plant Biol*. 2013; 56: 336–344.
55. Zhai L, Xu L, Wang Y, Huang D, Yu R, Limera C, et al. Genome-wide identification of embryogenesis-associated microRNAs in Radish (*Raphanus sativus* L.) by high-throughput sequencing. *Plant Mol Biol Rep*. 2014; 1–16.
56. Yang X, Wang L, Yuan D, Lindsey K, Zhang X. Small RNA and degradome sequencing reveal complex miRNA regulation during cotton somatic embryogenesis. *J Exp Bot*. 2013; 64(6): 1521–1536. doi: [10.1093/jxb/ert013](https://doi.org/10.1093/jxb/ert013) PMID: [23382553](https://pubmed.ncbi.nlm.nih.gov/23382553/)
57. Voinnet O. Origin, biogenesis, and activity of plant microRNAs. *Cell*. 2009; 136: 669–687. doi: [10.1016/j.cell.2009.01.046](https://doi.org/10.1016/j.cell.2009.01.046) PMID: [19239888](https://pubmed.ncbi.nlm.nih.gov/19239888/)
58. Kasschau KD, Xie Z, Allen E, Llave C, Chapman EJ, Krizan KA, et al. P1/HC-Pro, a Viral Suppressor of RNA Silencing, Interferes with *Arabidopsis* Development and miRNA Function. *Dev Cell*. 2003; 4: 205–217. PMID: [12586064](https://pubmed.ncbi.nlm.nih.gov/12586064/)
59. Baud S, Dubreucq B, Miquel M, Rochat C, Lepiniec L. Storage reserve accumulation in *Arabidopsis*: metabolic and developmental control of seed filling. *The Arabidopsis book/American Society of Plant Biologists*; 2008. pp. e0113.
60. Lau S, Slane D, Herud O, Kong J, Jürgens G. Early embryogenesis in flowering plants: setting up the basic body pattern. *Annu Rev Plant Biol*. 2012; 63: 483–506. doi: [10.1146/annurev-arplant-042811-105507](https://doi.org/10.1146/annurev-arplant-042811-105507) PMID: [22224452](https://pubmed.ncbi.nlm.nih.gov/22224452/)
61. De Smet I, Lau S, Ehrismann JS, Axiotis I, Kolb M, Kientz M, et al. Transcriptional repression of *BOD-ENLOS* by HD-ZIP transcription factor HB<sub>5</sub> in *Arabidopsis thaliana*. *J Exp Bot*. 2013; 64(10): 3009–3019. doi: [10.1093/jxb/ert137](https://doi.org/10.1093/jxb/ert137) PMID: [23682118](https://pubmed.ncbi.nlm.nih.gov/23682118/)

62. Hardtke CS, Berleth T. The *Arabidopsis* gene *MONOPTEROS* encodes a transcription factor mediating embryo axis formation and vascular development. *EMBO J.* 1998; 17: 1405–1411. PMID: [9482737](#)
63. Hamann T, Benkova E, Bäurle I, Kientz M, Jürgens G. The *Arabidopsis* *BODENLOS* gene encodes an auxin response protein inhibiting *MONOPTEROS*-mediated embryo patterning. *Genes Dev.* 2002; 16: 1610–1615. PMID: [12101120](#)
64. Boutilier K, Offringa R, Sharma VK, Kieft H, Ouellet T, Zhang L, et al. Ectopic expression of *BABY BOOM* triggers a conversion from vegetative to embryonic growth. *Plant Cell.* 2002; 14: 1737–1749. PMID: [12172019](#)
65. Wang X, Niu Q, Teng C, Li C, Mu J, Chua NH, et al. Overexpression of *PGA37/MYB118* and *MYB115* promotes vegetative-to-embryonic transition in *Arabidopsis*. *Cell Res.* 2008; 19: 224–235.
66. Grunewald W, De Smet I, De Rybel B, Robert HS, Van De Cotte B, Willemsen V, et al. Tightly controlled *WRKY23* expression mediates *Arabidopsis* embryo development. *EMBO Rep.* 2013; 14: 1136–1142. doi: [10.1038/embor.2013.169](#) PMID: [24157946](#)
67. Masiero S, Colombo L, Grini PE, Schnittger A, Kater MM. The emerging importance of type I MADS box transcription factors for plant reproduction. *Plant Cell.* 2011; 23: 865–872. doi: [10.1105/tpc.110.081737](#) PMID: [21378131](#)
68. Yin LL, Xue HW. The *MADS29* transcription factor regulates the degradation of the nucellus and the nucellar projection during rice seed development. *Plant Cell.* 2012; 24: 1049–1065. doi: [10.1105/tpc.111.094854](#) PMID: [22408076](#)
69. Höck J, Meister G. The Argonaute protein family. *Genome Biol.* 2008; 9: 210. doi: [10.1186/gb-2008-9-2-210](#) PMID: [18304383](#)
70. Mallory AC, Hinze A, Tucker MR, Bouché N, Gascioli V, Elmayan T, et al. Redundant and specific roles of the ARGONAUTE proteins AGO1 and ZLL in development and small RNA-directed gene silencing. *PLoS Genet.* 2009; 5: e1000646. doi: [10.1371/journal.pgen.1000646](#) PMID: [19763164](#)
71. Morel JB, Godon C, Mourrain P, Béclin C, Boutet S, Feuerbach F, et al. Fertile hypomorphic *ARGONAUTE (ago1)* mutants impaired in post-transcriptional gene silencing and virus resistance. *Plant Cell.* 2002; 14: 629–639. PMID: [11910010](#)
72. Deshpande G, Calhoun G, Schedl P. *Drosophila argonaute-2* is required early in embryogenesis for the assembly of centric/centromeric heterochromatin, nuclear division, nuclear migration, and germ-cell formation. *Genes Dev.* 2005; 19: 1680–1685. PMID: [16024657](#)
